# Supplementary material for: Microbial Community Structure and Chemical Constituents in Shinkiku, a Fermented Crude Drug Used in Kampo Medicine
Source: Front Nutr. 2020 Jul 31;7:115. doi: 10.3389/fnut.2020.00115 (PMC7416650; doi:10.3389/fnut.2020.00115)
Supplement: Supplementary file 1 [file Table_1.DOCX]

Supplementary Material

## Supplementary Table

**Table S1.** Total viable cell count in *shinkiku* products.

|  | | | |  |
| --- | --- | --- | --- | --- |
| Sample | Total viable cell count (cells/g) | |
| Filamentous fungia | Viable bacteriab |
| C1 | 1.0×102 | 1.3×108 |
| C2 | <102 | 1.2×108 |
| C3 | <102 | 1.1×108 |
| C4 | <102 | 7.8×108 |
| C5 | <102 | 1.0×108 |
| C6 | <102 | 1.1×108 |
| C7 | <102 | 1.0×108 |
| K8 | <102 | 2.5×103 |
| K9 | <102 | 7.0×102 |
| K10 | <102 | 3.1×103 |
| K11 | 3.5×102 | 5.8×103 |
| K12 | <102 | 4.7×103 |
| K13 | 1.5×106 | 2.5×102 |

a: Appropriately diluted suspension of *shinkiku* was plated on to *Koji*-extract medium (Ishiyama et al., 2008) contains 0.1% triton, and the number of colonies were counted after incubation at 30°C for 42-46 h.

b: Appropriately diluted suspension of *shinkiku* was plated on to Anti-Fungus Culture Medium (DAIGO, Wako Pure Industries Ltd., Osaka, Japan), and the number of colonies were counted after incubation at 30°C for 42-46 h.
